# Supplementary material
Source: publisher site journal article supplement (https://www.degruyterbrill.com/publication/isbn/9783110342055/downloadAsset/9783110342055_Inhaltsverzeichnis.pdf)
Supplement: Supplementary file 1 [file 9783110342055_Inhaltsverzeichnis.pdf]

# Inhalt

## Vorwort — IX

## Abkürzungsverzeichnis — XI

- 1      **Ouvertüre: „Ein vreemdeling steht in Amsterdam. Wohin.“ — 1**
- 2      **Kontakt der Kulturen: Kommunikation und Transfer — 9**
  - 2.1      Literaturgeschichte als Selektions- und Darstellungsproblem — 9
  - 2.2      „Auch die Briefe waren im Exil.“ Briefverkehr im Exil — 18
  - 2.3      Vermittlung und Vermittler — 28
- 3      **Wandel der literarischen Wechselbeziehungen — 41**
  - 3.1      Das niederländische Literatursystem zwischen den Kriegen — 41
  - 3.2      „Gott fürchten, ja, aber weiter?“ Joseph Roths *Antichrist* als Spiegel des niederländischen Literatursystems — 46
  - 3.3      Hymne für Holland? Bestandsaufnahme der deutsch-niederländischen Exilforschung — 57
- 4      **Vorgeschichte — 65**
  - 4.1      Literarische Verschränkungen vor 1934: Fakten und Daten — 65
  - 4.2      „Es waren zwei bedeutsame Tatsachenkomplexe, die den allmählichen Untergang bildeten.“ Jakob Wassermann in Verhandlung mit seinen niederländischen Verlagen — 76
  - 4.3      Dichterische Verflechtungen: Stefan George – Albert Verwey – Karl Wolfskehl — 88
  - 4.4      „Ich glaube, Sie wissen in Ihrer ruhigen Heimat gar nicht, welchen Zeiten wir entgegengehen!“ Frühe Bekanntschaften und pazifistische Ethik: Andreas Latzko — 99
- 5      **Verzweiflung, Aufbruch und Neubeginn — 111**
  - 5.1      „Von all dem spüren Sie glücklicherweise nichts in dem Lande mit dem ewig gleichmäßigen Puls.“ Stefan Zweig – Andreas Latzko — 111
  - 5.2      Produktion und Vertrieb von Exilliteratur im niederländischen Setting — 116

- 5.3 „Daß ich mir die größte Mühe geben werde, Ihre Wünsche zu befolgen, möchte ich Ihnen nochmals versichern.“ Fritz Landhoff zwischen Markt und Autoren — **128**

**6 Vermittlungen — 143**

- 6.1 Polemisieren und Internationalisieren: Menno ter Braak — **143**  
6.1.1 Ter Braak contra Rudolf Binding — **143**  
6.1.2 Menno ter Braak – A. Vigoleis Thelen – Thomas Mann — **147**  
6.1.3 „Wie konnten Sie nur ein solches Buch schreiben!“ Proklamation einer neuen europäischen Literatur — **155**  
6.2 „Nicht leicht, dem niederländischen Publikum den deutschen Geist zu erläutern.“ Übersetzen und Übersetztwerden: Felix & Elisabeth Augustin und Augusta de Wit — **160**  
6.3 „Glauben Sie mir, bitte, dass ich nicht solange bei dieser Frage verharren würde, wenn sie nicht wichtig wäre.“ Gestaltungen von Bert Brechts *Dreigroschenroman* — **168**

**7 Auffächerung des Polysystems — 187**

- 7.1 „... Statt ‚Geflüchtete‘ – Emigrierte oder Ausgewanderte.“ Alfred Döblin und *Der RUF* — **187**  
7.2 „Modebücher der neuen Generation.“ Gina Kaus und Irmgard Keun in der niederländischen Presse — **195**  
7.3 Eine Dichter-Runde lässt sich nieder. Wolfgang Frommel und Castrum Peregrini — **209**  
7.4 Skandal in Dubrovnik und andere Peinlichkeiten — **218**

**8 Der Zweite Weltkrieg — 225**

- 8.1 Schreiben, Verlegen und Lesen unter deutscher Besatzung — **225**  
8.2 „Solange es noch einen Menschen gibt, der deutsch liest, werde ich weiterverlegen.“ Fritz Landshoff — **232**  
8.3 „The individual you inquired about has been heard from and is well.“ Johan Warendorf – Leopold Schwarzschild – Marinus Warendorf — **238**  
8.4 „Es ist Krieg. De Moffen!“ Wolfgang Cordan als Literaturvermittler im Krieg — **248**

**9 Nachgeschichte — 261**

- 9.1 „We hope this letter will reach you.“ Adrienne Thomas und ihre niederländischen Verlage — **261**

- 9.2 „Das Schicksal hat mich nun in den verhängnisvollen Jahren nach Holland geführt.“ Ludwig Kunz — **269**
- 9.3 Zwischen den Sprachen: Akkulturation und das Schreiben — **281**
- 9.3.1 „Schreiben, das heißt an einer Kette liegen.“ Elisabeth Augustin — **281**
- 9.3.2 „Godverdikumie! wat is het Hollandsch toch moeilijk!“ Konrad Merz — **288**
- 9.3.3 „Lieber Holland als Heimweh.“ Hans Keilson — **295**
- 9.4 „Deutsches Volkslied mit Noten – nein – wir singen nicht mehr.“ David Luschnat — **303**
- 9.5 „Nun ist meine eigene Enttäuschung sehr groß.“ Fritz Landshoff — **311**
- 9.6 Rezeption der Exilliteratur in den Niederlanden nach 1945 — **318**

## **10 Spuren in der Gegenwart — 331**

- 10.1 Erinnerungen für die Zukunft — **331**
- 10.1.1 Vorbemerkungen — **331**
- 10.1.2 Als Zeuge darf man nichts weglassen. Grete Weil — **332**
- 10.1.3 Durchs Eis gebrochen. G. L. Durlacher — **345**
- 10.2 Ein Sprung ins Ungewisse. Aufstieg und Blüte literarischer Agenturen — **354**
- 10.2.1 Barthold Fles — **354**
- 10.2.2 Hein(z) Kohn — **358**
- 10.2.3 Kurt Hirsch/Robert Harben — **360**
- 10.2.4 Ruth und Heinz Liepman(n) — **363**
- 10.3 Wiederkehr des Gleichen? Aktualität und Wiederentdeckung — **365**
- 10.3.1 Vorbemerkungen — **365**
- 10.3.2 „Hans Keilson is a genius“ — **368**
- 10.3.3 Wirtschaftskrise und Populismus. Hans Fallada — **375**
- 10.4 Alte und neue Europavisionen — **384**

## **Verzeichnis der unveröffentlichten Dokumente nach Namen der Verfasser — 395**

## **Bibliographie I: Gedruckte Quellen — 400**

## **Bibliographie II: Primäre und sekundäre Literatur — 409**

Internetseiten — **422**

## **VIII — Inhalt**

**Abbildungsverzeichnis — 424**

**Namenregister — 427**
